# Supplementary material for: Direct evidence for the influence of lithium ion vacancies on polaron transport in nanoscale LiFePO4
Source: Royal Society of Chemistry journal article supplement (doi:10.1039/c9cp00408d), 2019-01-01
Supplement: c9cp00408d1.pdf [file c9cp00408d1.pdf]

## Supplementary information

### Direct evidence for the influence of lithium ion vacancies on polaron transport in nanoscale LiFePO<sub>4</sub>

Azeem Banday<sup>1</sup>, Mahboob Ali<sup>1</sup>, Raghvendra Pandey<sup>2</sup> and Sevi Murugavel<sup>1\*</sup>

<sup>1</sup>Department of Physics & Astrophysics, University of Delhi, Delhi-110007, India

<sup>2</sup>Department of Physics, ARSD College, University of Delhi, Delhi-110007, India

**Table S1.** The temperature and time duration used to synthesize different crystallite sized LFP samples

| Crystallite size (nm) | Temperature (K) | Time period (hrs.) |
|-----------------------|-----------------|--------------------|
| 40                    | 1023            | 6                  |
| 36                    | 1023            | 4                  |
| 34                    | 1023            | 2                  |
| 30                    | 823             | 8                  |
| 27                    | 823             | 6                  |

**Table S2:-** List of important parameters related to polaronic dc conduction in LFP for various crystallite sizes estimated from Mott fitting and Rietveld refinement.  $\theta_D$  is the Debye temperature,  $\nu_{ph}$  is the optical phonon frequency,  $R$  is the long-range polaron hopping distance,  $E_a^{Lt}$  and  $E_a^{Ht}$  are the activation energy at intermediate and high temperatures, and lithium ion vacancy concentration determined by the XRD Rietveld refinement analysis.

| Crystallite Size (nm) $\pm 2$ nm | $\theta_D$ (K) | $\nu$ (Hz) $\times 10^{13}$ | $R$ (Å) $\pm E_r$ | $E_a^{Lt}$ (eV) | $E_a^{Ht}$ (eV) | Polaron concentration (%) $\pm E_r$ | LIV concentration (%) |
|----------------------------------|----------------|-----------------------------|-------------------|-----------------|-----------------|-------------------------------------|-----------------------|
| 27                               | 567            | 1.18                        | 2.79 $\pm 0.05$   | 0.571           | 0.651           | 17.0 $\pm 0.12$                     | 17                    |
| 30                               | 574            | 1.19                        | 2.80 $\pm 0.03$   | 0.587           | 0.655           | 11.0 $\pm 0.2$                      | 14.65                 |
| 34                               | 596            | 1.24                        | 2.93 $\pm 0.01$   | 0.595           | 0.659           | 8.4 $\pm 0.31$                      | 13.03                 |
| 36                               | 605            | 1.26                        | 3.12 $\pm 0.02$   | 0.601           | 0.665           | 7.0 $\pm 0.12$                      | 10.54                 |
| 40                               | 615            | 1.29                        | 3.42 $\pm 0.05$   | 0.645           | 0.677           | 6.5 $\pm 0.11$                      | 10.15                 |

**Table S3:** Structure related parameters obtained from the Rietveld refinement for LFP sample with 27 nm crystallite size

| Wavelength (Å)      |       | 0.78799     |          |          |           |
|---------------------|-------|-------------|----------|----------|-----------|
| Space group         |       | <i>Pnma</i> |          |          |           |
| a (Å)               |       | 10.3153     |          |          |           |
| b (Å)               |       | 6.0012      |          |          |           |
| c (Å)               |       | 4.7011      |          |          |           |
| V (Å <sup>3</sup> ) |       | 291.022     |          |          |           |
| R <sub>p</sub> (%)  |       | 3.42        |          |          |           |
| R <sub>wp</sub> (%) |       | 4.55        |          |          |           |
| GOF( $\chi^2$ )     |       | 6.538       |          |          |           |
| Site                | Wyck. | x/a         | y/b      | z/c      | Occupancy |
| Li                  | 4a    | 0 0.0000    | 0 0.0000 | 0 0.0000 | 0.8300    |
| Fe                  | 4c    | 0 0.2820    | 0 0.2500 | 0 0.9731 | 0.9964    |
| P                   | 4c    | 0 0.0953    | 0 0.2500 | 0 0.4193 | 1.0000    |
| O                   | 4c    | 0 0.0962    | 0 0.2500 | 0 0.7404 | 1.0000    |
| O                   | 4c    | 0 0.4579    | 0 0.2500 | 0 0.2056 | 1.0000    |
| O                   | 8d    | 0 0.1653    | 0 0.0491 | 0 0.2828 | 1.0000    |
| Fe                  | 4a    | 0 0.0000    | 0 0.0000 | 0 0.0000 | 0.0050    |

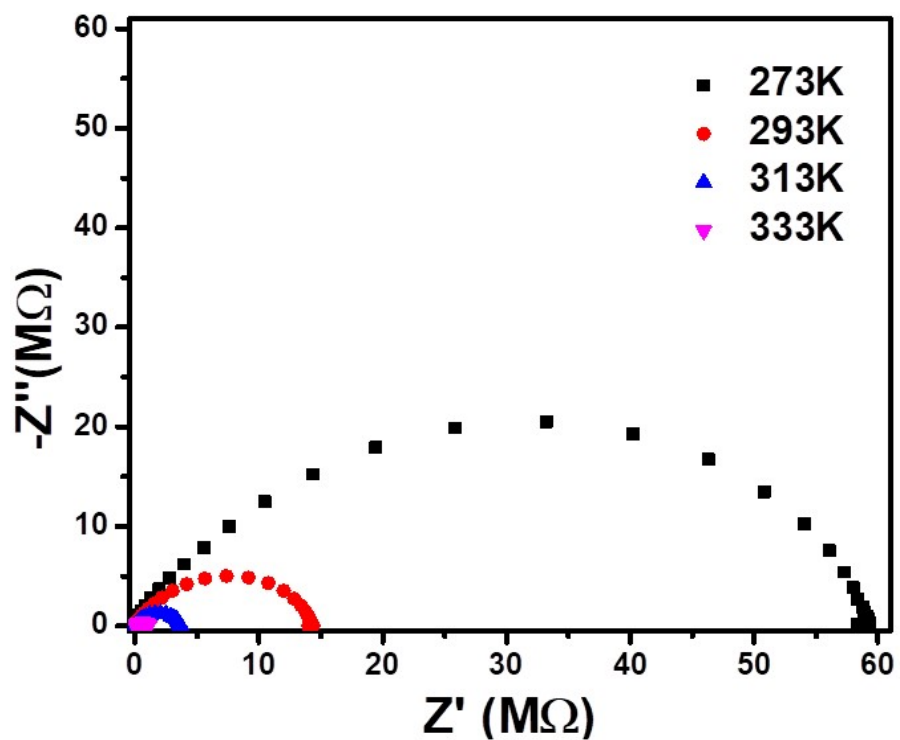

Fig. S1. Nyquist plot for LFP sample with 30 nm crystallite size.

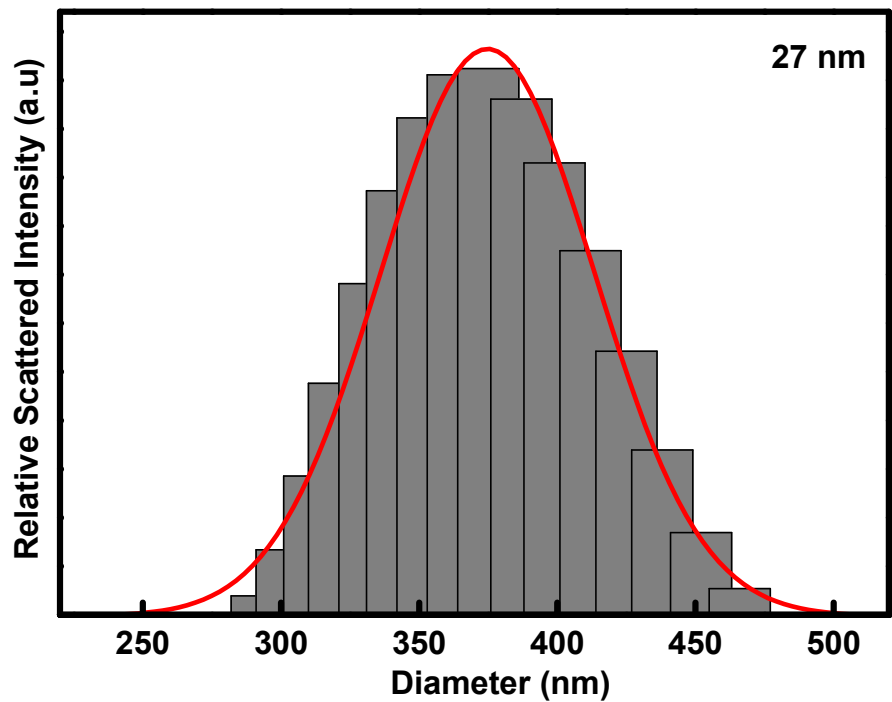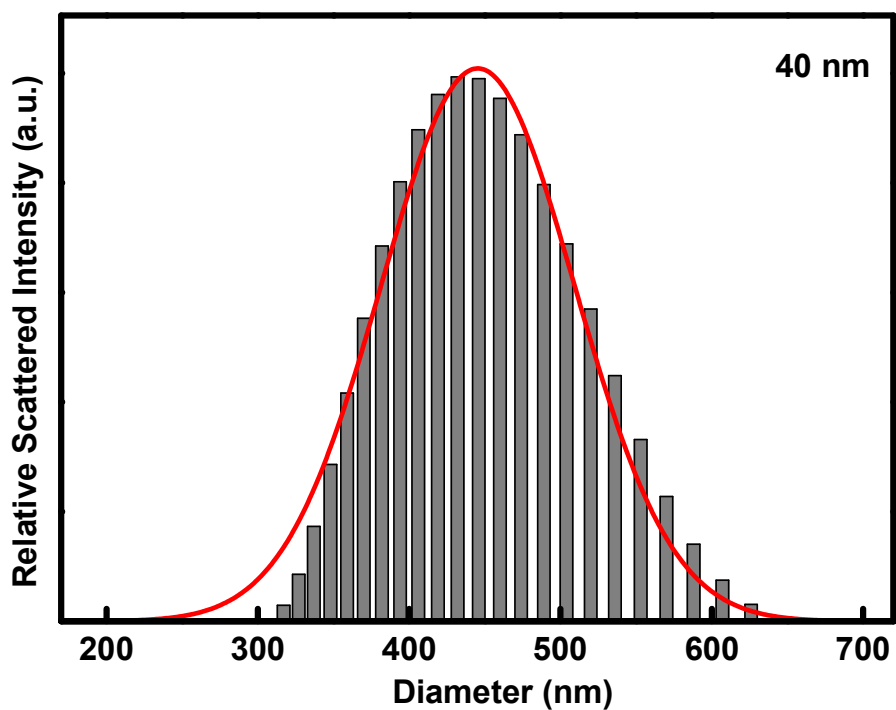

**Fig. S2.** The article size distribution histogram of representative 27 nm and 40 nm crystallite size of LFP sample obtained by dynamic light scattering method.
